# Supplementary material
Source: PubMed Central journal article supplement (PMC5703804)
Supplement: JCM.01018-17_zjm999095709s1.pdf [file JCM.01018-17_zjm999095709s1.pdf]

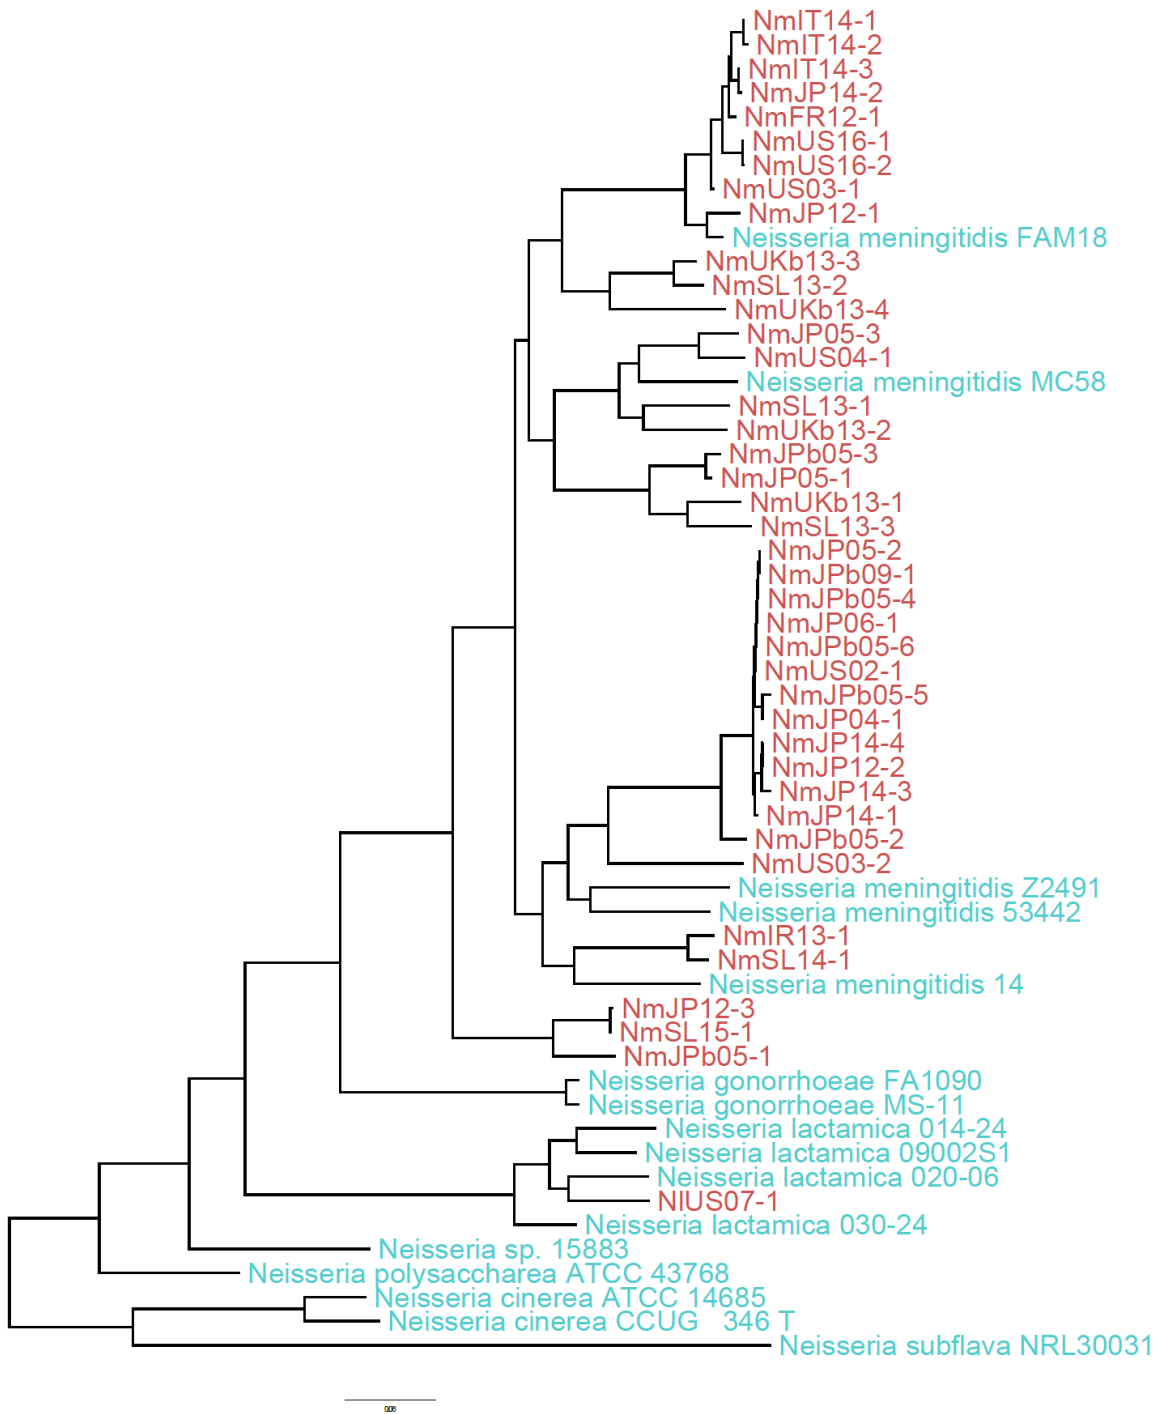

**Supplemental Figure S1: PhyloPhIAn phylogeny of nongonococcal urethritis isolates and selected reference isolates from Bennett et al. (2012).** Reference isolates denoted in blue; nongonococcal urethritis isolates denoted in red.

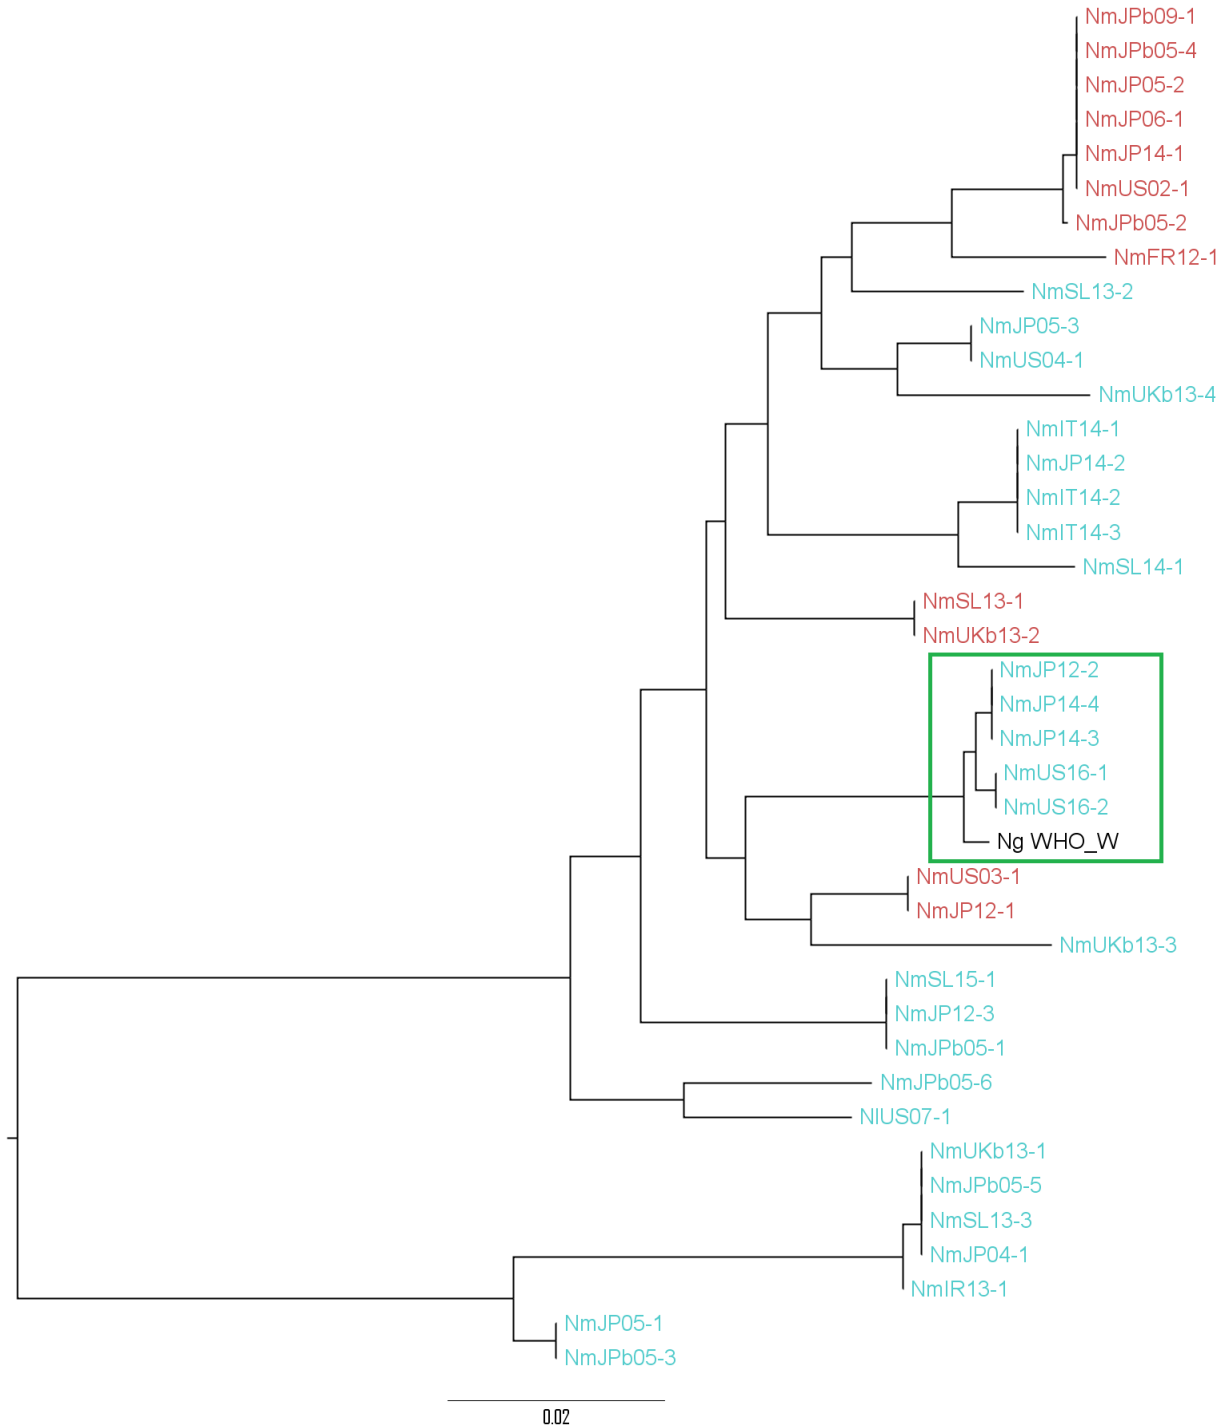

**Supplemental Figure S2: Neighbor-joining nucleotide phylogeny of *aniA*.**

Alleles of *aniA* were aligned using MAFFT. Isolates with frameshifted *aniA* are denoted in red; isolates with full-length *aniA* are denoted in blue. The clade outlined in green contains *aniA* of putative gonococcal origin. Ng WHO\_W is a reference *aniA* allele from a gonococcal strain.

## Supplementary Table 1: Accession Numbers

| <b>Sample</b> | <b>Accession Number</b> |
|---------------|-------------------------|
| NIUS07-1      | NGBO00000000            |
| NmJP04-1      | NGBN00000000            |
| NmJP05-1      | NGBM00000000            |
| NmJP05-2      | NGBL00000000            |
| NmJP05-3      | NGBK00000000            |
| NmJP06-1      | NGBJ00000000            |
| NmJP12-1      | NGBI00000000            |
| NmJP12-2      | NGBH00000000            |
| NmJP12-3      | NGBG00000000            |
| NmJP14-1      | NGBF00000000            |
| NmJP14-2      | NGBE00000000            |
| NmJP14-3      | NGBD00000000            |
| NmJP14-4      | NGBC00000000            |
| NmJPb05-1     | NGBB00000000            |
| NmJPb05-2     | NGBA00000000            |
| NmJPb05-3     | NGAZ00000000            |
| NmJPb05-4     | NGAY00000000            |
| NmJPb05-5     | NGAX00000000            |
| NmJPb05-6     | NGAW00000000            |
| NmJPb09-1     | NGAV00000000            |
| NmSL13-1      | NGAU00000000            |
| NmSL13-2      | NGAT00000000            |
| NmSL13-3      | NGAS00000000            |
| NmSL14-1      | NGAR00000000            |
| NmSL15-1      | NGAQ00000000            |
| NmUS02-1      | NGAP00000000            |
| NmUS03-1      | NGAO00000000            |
| NmUS03-2      | NGAN00000000            |
| NmUS04-1      | NGAM00000000            |
